# Supplementary material for: A Mo/PANI co-modified ultra-high nickel NCM9622 cathode composite with excellent cycle stability and high-rate performance for power batteries
Source: Royal Society of Chemistry journal article supplement (doi:10.1039/d4ta03016h), 2024-01-01
Supplement: d4ta03016h1.pdf [file d4ta03016h1.pdf]

## Supplementary Information

### **Mo/PANI co-modified ultra-high nickel NCM9622 cathode composite with excellent cycle stability and high-rate performance for power batteries**

Jinfu Huang,<sup>a</sup> Liang Zhang,<sup>a</sup> Hongyu Tang,<sup>a</sup> Shengyi Huang,<sup>a</sup> Yang Tang,<sup>a</sup> Jianyao Ma,<sup>a</sup> Bin Huang,<sup>a</sup> Yanwei Li,<sup>\*,a</sup> Yiling Sun,<sup>\*,b</sup> Shunhua Xiao,<sup>\*,a</sup> and Renheng Wang,<sup>\*,b,c</sup>

<sup>a</sup>Guangxi Colleges and Universities Key Laboratory of Surface and Interface Electrochemistry, Guangxi Key Laboratory of Electrochemical and Magnetochemical Functional Materials, College of Chemistry and Bioengineering, Guilin University of Technology, Guilin 541004, Guangxi, China

<sup>b</sup>Key Laboratory of Optoelectronic Devices and Systems of Ministry of Education and Guangdong Province, College of Physics and Optoelectronic Engineering, Shenzhen University, Shenzhen 518060, Guangdong, China

<sup>c</sup>Key Laboratory of Advanced Electrode Materials for Novel Solar Cells for Petroleum and Chemical Industry of China, School of Chemistry and Life Sciences, Suzhou University of Science and Technology, Suzhou City, Jiangsu Province 215009, P. R. China.

\*Corresponding Authors.

E-mail: 1999014@glut.edu.cn, lywhit@126.com,  
sunyl@szu.edu.cn, wangrh@szu.edu.cn

### GITT test methods

Firstly, the newly assembled half-cells are subjected to three charge-discharge cycles at 0.1 C for initial activation, and then the cells are tested for charge-discharge at a current density of 0.1 C, a pulse time of 10 min, a relaxation time of 30 min, and a voltage window of 2.7-4.4 V. The  $\text{Li}^+$  diffusion coefficients ( $D_{\text{Li}^+}$ ) can be calculated by the following equations:

$$D_{\text{Li}^+} = \frac{4}{\pi\tau} \left[ \left( \frac{m_B V_M}{M_B S} \right) \left( \frac{\Delta E_s}{\Delta E_\tau} \right) \right]^2 (\tau \ll L^2/D)$$

Where  $m_B$  is the mass (g) of the active substance,  $V_m$  and  $M_B$  are the molar volume ( $\text{cm}^3 \text{mol}^{-1}$ ) and molecular weight ( $\text{g mol}^{-1}$ ) respectively,  $S$  is the electrode area ( $\text{cm}^2$ ),  $\tau$  is the duration (s) of a single current pulse,  $\Delta E_s$  is the steady-state voltage difference (V) after relaxation for 30 min, and  $\Delta E_\tau$  is the transient voltage difference (V) after the current pulse. The parameters  $\Delta E_s$ ,  $\Delta E_\tau$  and  $\tau$  in the formula can be obtained from the single pulse GITT curves of Figs. 6(e-g). Based on the data of discharge voltage ( $V$ ) and corresponding pulse time ( $\tau$ ) in Fig. 6(e-g), the relationship between the discharge voltage ( $V$ ) and the square root of pulse time ( $\tau^{1/2}$ ) is obtained, as shown in Fig. 6(i)

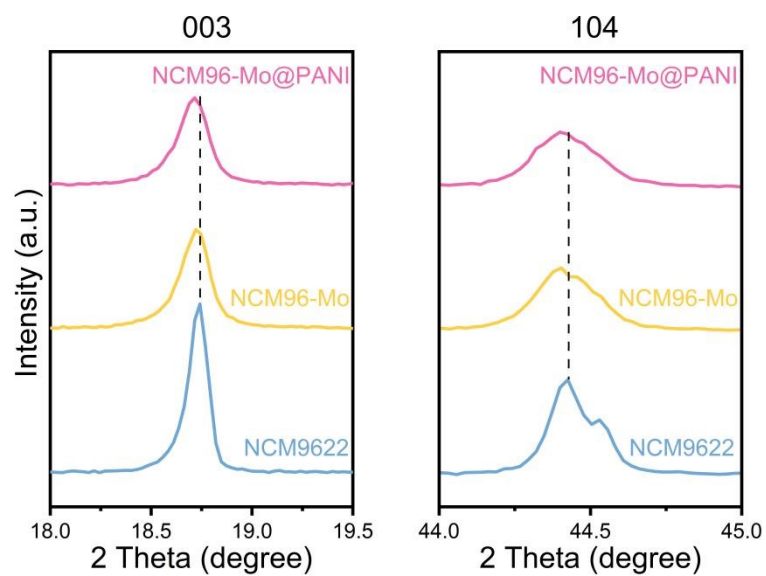

Fig. S1† Enlarged view corresponding to the (003) and (104) diffraction peaks in the XRD pattern.

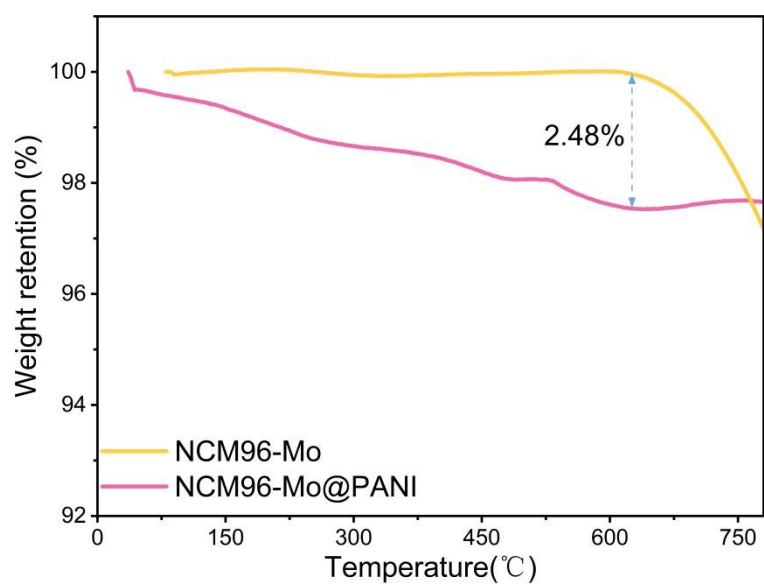

Fig. S2† TGA curves of NCM96-Mo and NCM96-Mo@PANI materials.

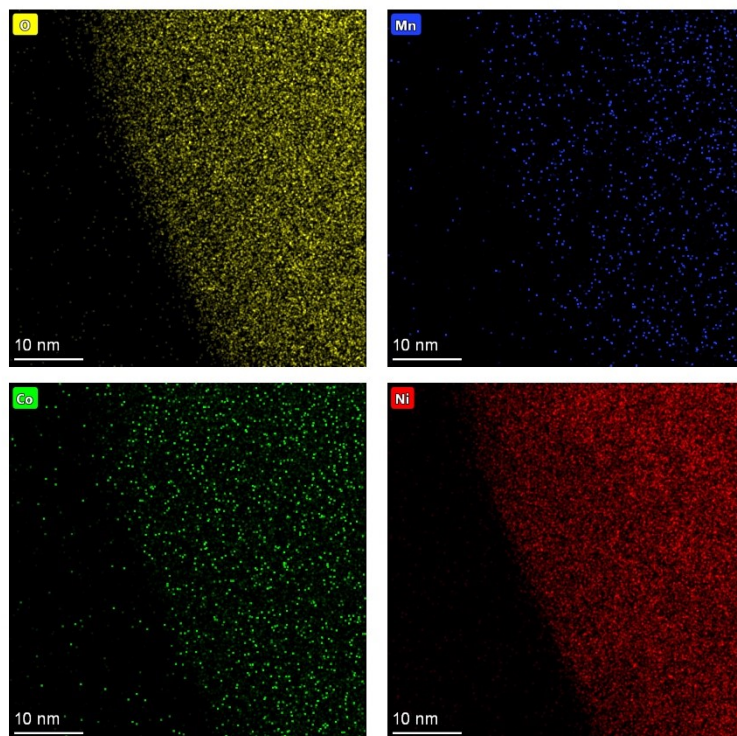

Fig. S3† Mapping of O, Mn, Co and Ni elements of NCM96-Mo@PANI in STEM.

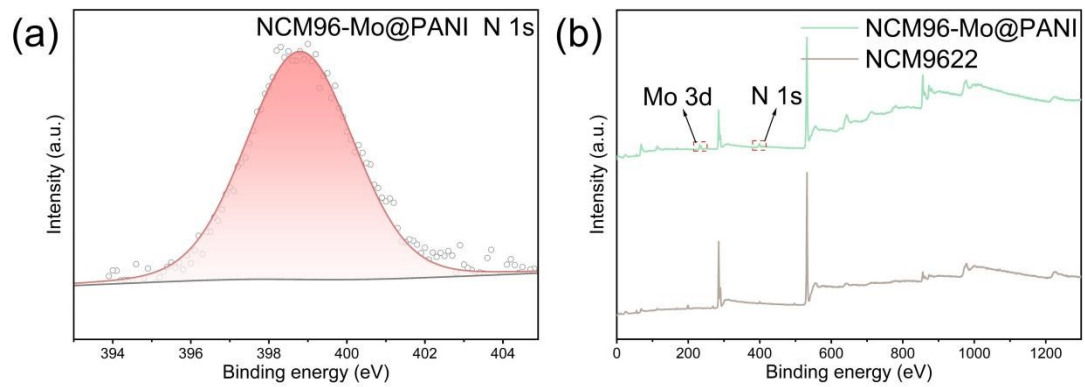

Fig. S4† (a) N 1s XPS spectra of NCM96-Mo@PANI material; (b) XPS full spectra of NCM9622 and NCM96-Mo@PANI materials.

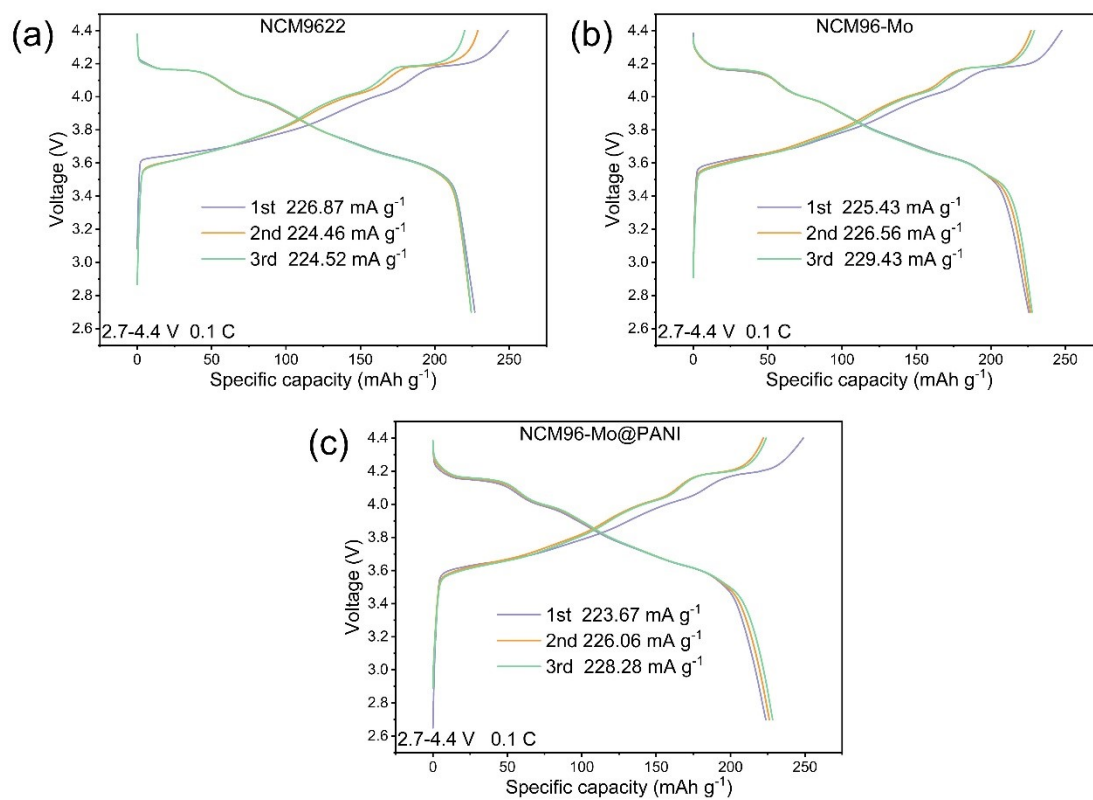

Fig. S5† The first three cycles charge-discharge curves of NCM9622 (a), NCM96-Mo (b) and NCM96-Mo@PANI (c) materials at 2.7-4.4 V and 0.1 C.

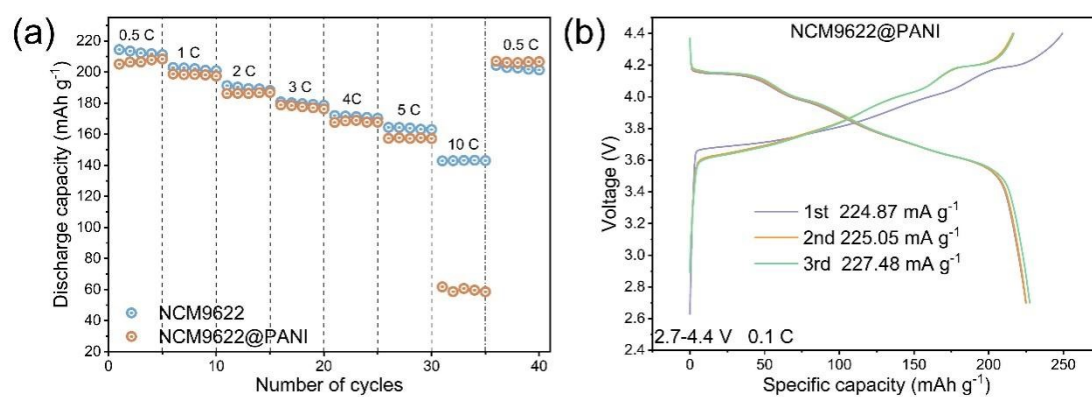

Fig. S6† (a) Rate performances of NCM9622 and NCM9622@PANI materials, and (b) the first three cycles charge-discharge curves of NCM9622@PANI material at 2.7-4.4 V and 0.1 C.



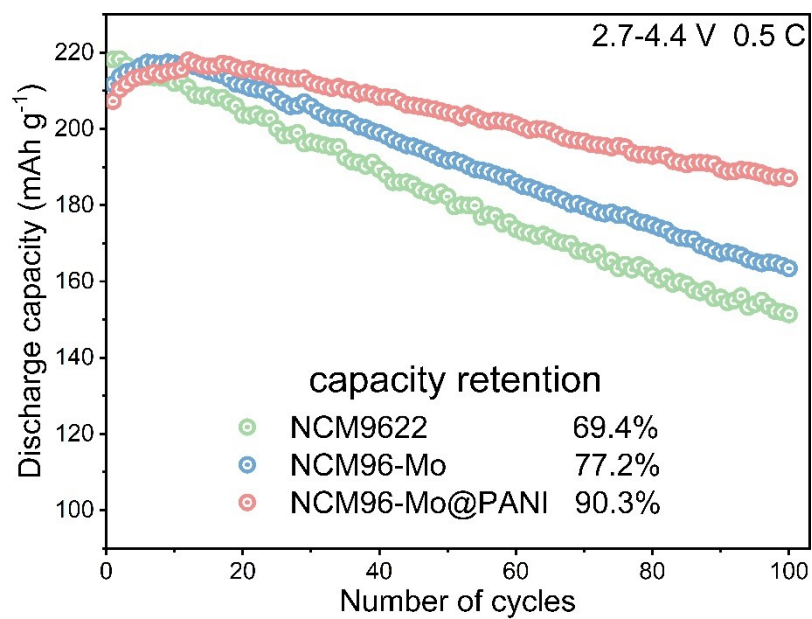

Fig. S7† Cyclic performances of NCM9622, NCM96-Mo and NCM96-Mo@PANI samples at 2.7-4.4 V and 0.5 C.

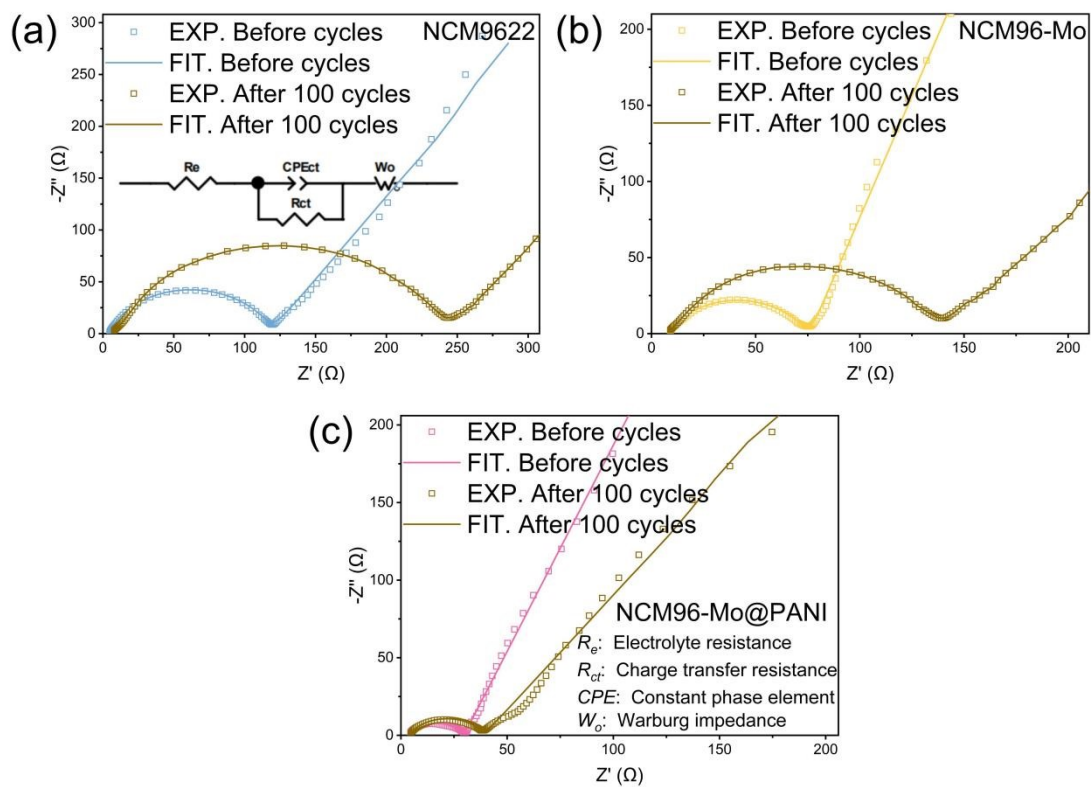

Fig. S8† EIS diagrams of (a) NCM9622, (b) NCM96-Mo and (c) NCM96-Mo@PANI materials before and after 100 cycles at 1 C.

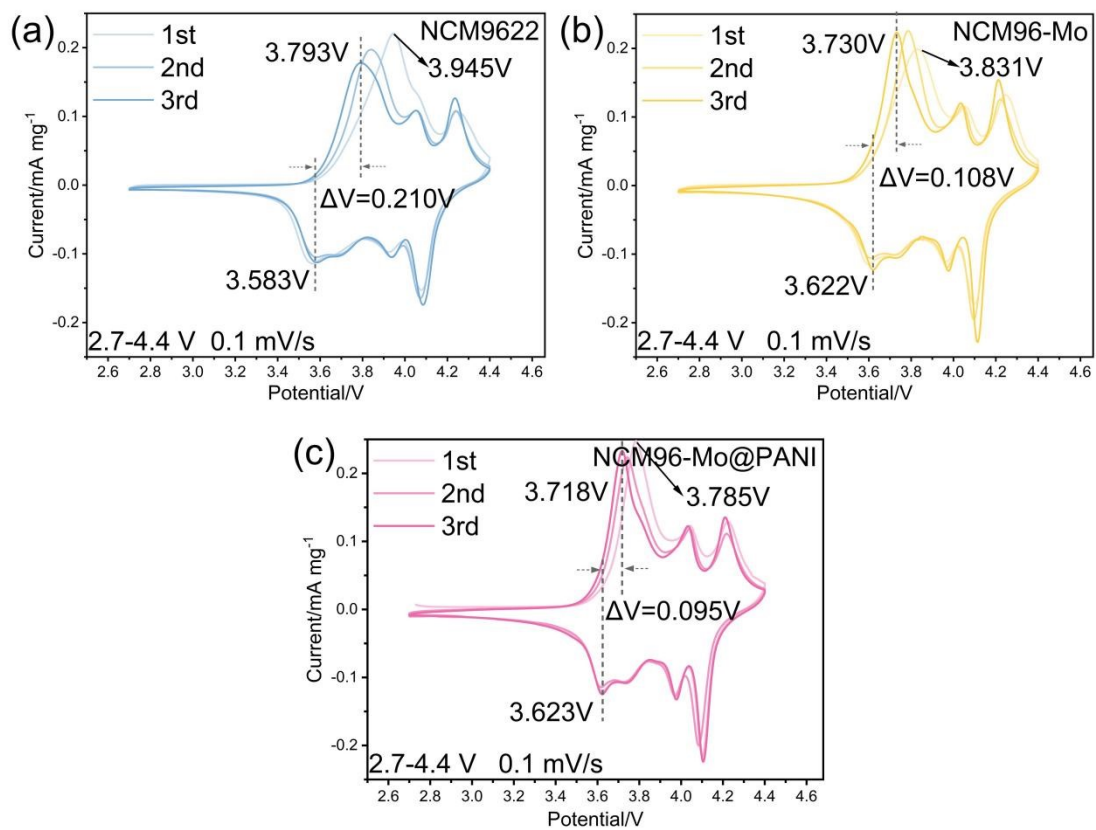

Fig. S9† CV curves of (a) NCM9622, (b) NCM96-Mo, (c) NCM96-Mo@PANI materials at the first three cycles.

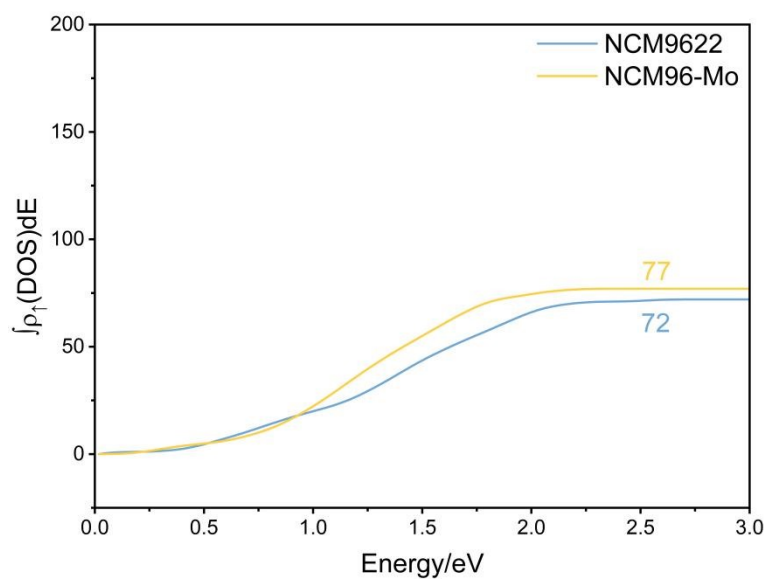

Fig. S10† Integral results of the spin-up total density of states (TDOS) of NCM9622 and NCM96-Mo materials between 0 and 3 eV

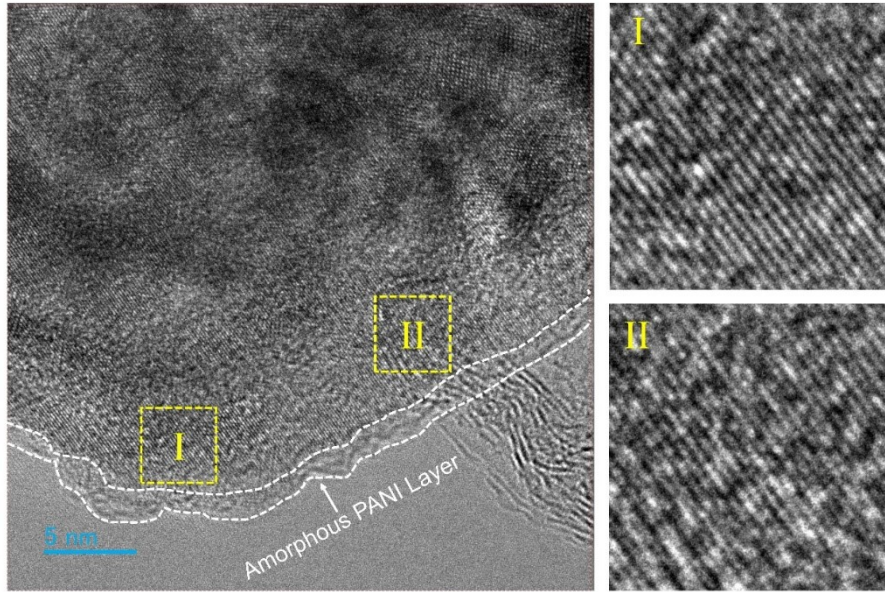

Fig. S11† TEM image of NCM96-Mo@PANI material after 100 cycles at 1 C

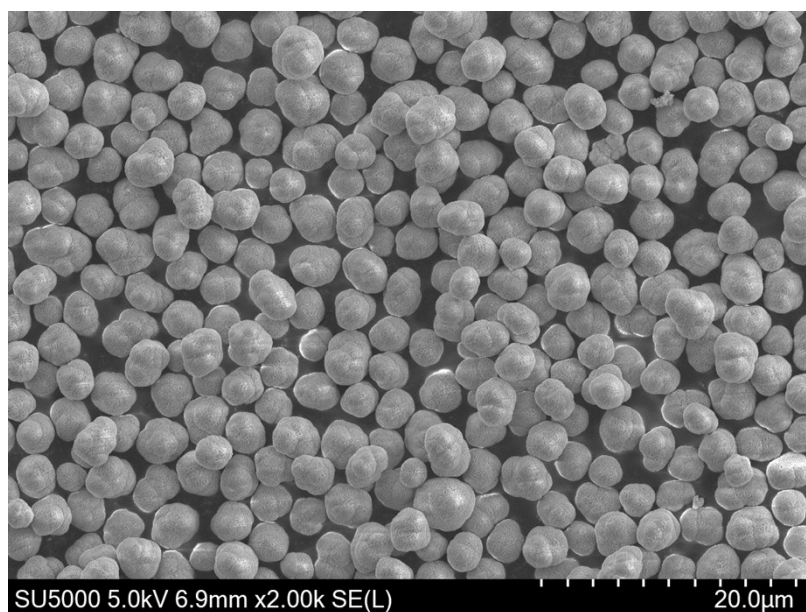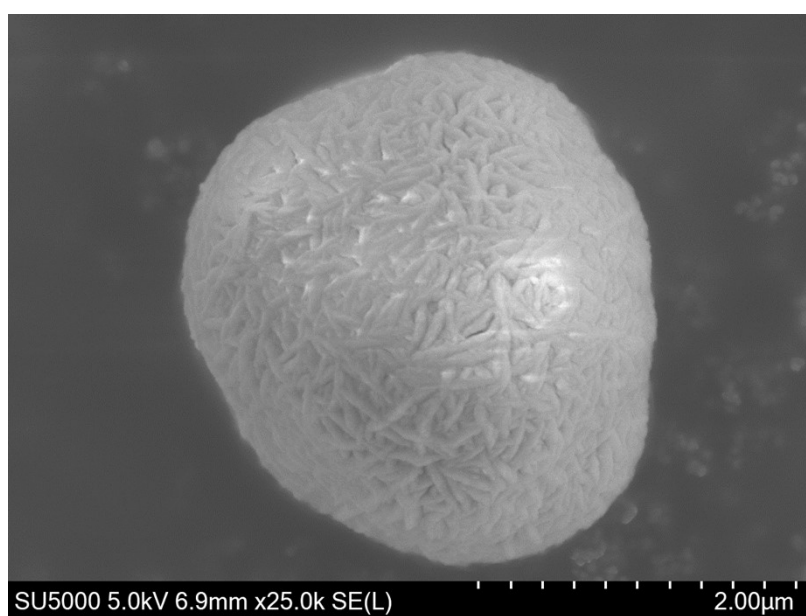

Fig. S12† SEM image of  $\text{Ni}_{0.96}\text{Co}_{0.02}\text{Mn}_{0.02}(\text{OH})_2$  precursor

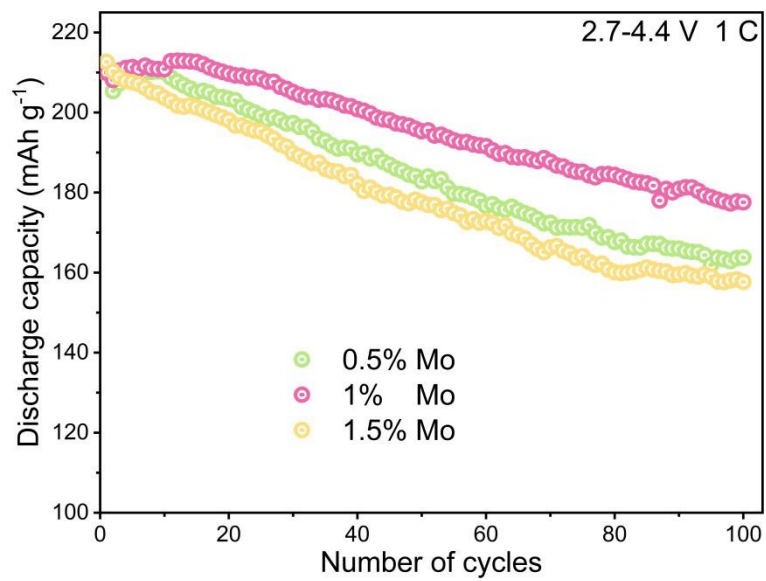

Fig. S13† Cycling performances of NCM96-Mo material with 0.5%, 1% and 1.5%Mo doping.

Table S1† Rietveld refinement data of materials

| Samples       | $a=b$ (Å) | $c$ (Å)  | $c/a$    | $V$ (Å <sup>3</sup> ) | Li/Ni exchange (%) | $R_{wp}$ (%) |
|---------------|-----------|----------|----------|-----------------------|--------------------|--------------|
| NCM9622       | 2.87228   | 14.18206 | 4.937562 | 101.327               | 2.39%              | 6.3          |
| NCM96-Mo      | 2.87478   | 14.19823 | 4.938893 | 101.619               | 3.45%              | 6.4          |
| NCM96-Mo@PANI | 2.87426   | 14.20372 | 4.941696 | 101.621               | 3%                 | 6.3          |



Table S2† Comparison of cycling stability of NCM96-Mo@PANI cathode with the Ni-rich cathodes reported before.

| Samples       | 100 <sup>th</sup> capacity retention/rate | The range of operating voltage/V | References |
|---------------|-------------------------------------------|----------------------------------|------------|
| NCM96-Mo@PANI | 90.3%/0.5 C                               | 2.7-4.4                          | This work  |
| Ti-NM90       | 88.9%/0.5 C                               | 2.7-4.4                          | 1          |
| Al-NM90       | 88.2%/0.5 C                               | 2.7-4.4                          | 1          |
| Sn-NCM90      | 87.9%/0.5 C                               | 2.7-4.4                          | 2          |
| Co-NM90       | 86.3%/0.5 C                               | 2.7-4.4                          | 1          |
| LWO-NCM90     | 84.6%/0.5 C (80 <sup>th</sup> )           | 3.0-4.3                          | 3          |
| Ga-NCA94      | 84.4%/0.5 C                               | 2.7-4.3                          | 4          |
| Zr-NCA94      | 79.2%/0.5 C                               | 2.7-4.3                          | 4          |

#### References:

- 1 Y. J. Sun, C. H. Wang, W. J. Huang, G. F. Zhao, L. Y. Duan, Q. Liu, S. M. Wang, A. Fraser, H. Guo and X. L. Sun, *Angewandte Chemie-International Edition*, 2023, **62**, 202300962
- 2 G.-T. Park, B. Namkoong, S.-B. Kim, J. Liu, C. S. Yoon and Y.-K. Sun, *Nature Energy*, 2022, **7**, 946-954
- 3 S. Jamil, A. Bin Yousaf, S. Hee Yoon, D. Suk Han, L. Yang, P. Kasak and X. Wang, *Chemical Engineering Journal*, 2021, **416**, 129118
- 4 W. M. Seong, K.-H. Cho, J.-W. Park, H. Park, D. Eum, M. H. Lee, I.-s. S. Kim, J. Lim and K. Kang, *Angewandte Chemie International Edition*, 2020, **59**, 18662-18669
- 5 U.-H. Kim, N.-Y. Park, G.-T. Park, H. Kim, C. S. Yoon and Y.-K. Sun, *Energy Storage Materials*, 2020, **33**, 399-407
- 6 S.-B. Lee, N.-Y. Park, G.-T. Park, U.-H. Kim, S.-J. Sohn, M.-S. Kang, R. M. Ribas, R. S. Monteiro and Y.-K. Sun, *ACS Energy Letters*, 2024, **9**, 740-747
- 7 T. Thien Nguyen, U.-H. Kim, C. S. Yoon and Y.-K. Sun, *Chemical Engineering Journal*, 2021, **405**, 126887

- 8 S.-J. Sim, S.-H. Lee, B.-S. Jin and H.-S. Kim, *Journal of Power Sources*, 2021, **481**, 229037
- 9 C.-H. Jung, D.-H. Kim, D. Eum, K.-H. Kim, J. Choi, J. Lee, H.-H. Kim, K. Kang and S.-H. Hong, *Advanced Functional Materials*, 2021, **31**, 2010095

Table S3† Impedance fitting data of NCM9622, NCM96-Mo and NCM96-Mo@PANI materials before and after 100 cycles at 1 C

| Samples       | Before 100 cycles  |                       | After 100 cycles   |                       |
|---------------|--------------------|-----------------------|--------------------|-----------------------|
|               | $R_e$ ( $\Omega$ ) | $R_{ct}$ ( $\Omega$ ) | $R_e$ ( $\Omega$ ) | $R_{ct}$ ( $\Omega$ ) |
| NCM9622       | 4.356              | 113.2                 | 7.252              | 228.1                 |
| NCM96-Mo      | 8.305              | 63.51                 | 8.346              | 117.1                 |
| NCM96-Mo@PANI | 2.888              | 26.78                 | 3.628              | 35.46                 |
